# Supplementary material
Source: PubMed Central journal article supplement (PMC7960685)
Supplement: NIHMS1676427-supplement-S_Fig_2.pdf [file NIHMS1676427-supplement-S_Fig_2.pdf]

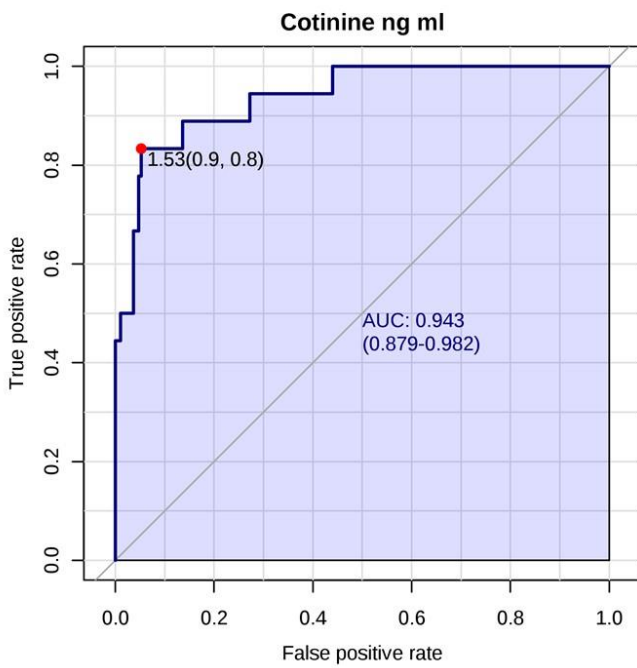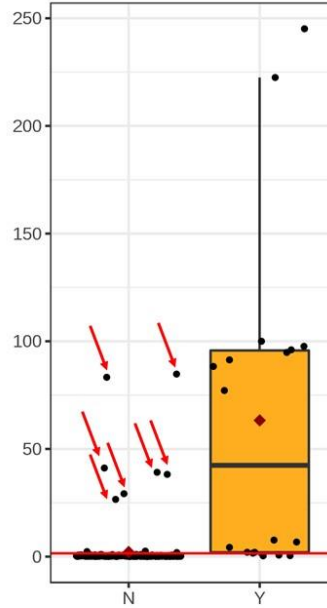

**Supplementary Figure 2 - Direct measurements of Cotinine levels predict smoking behaviour from the self-reported questionnaire** (yes – Y /no – N). The Receiver Operating characteristic (ROC) curve shows an area under the curve of 0.938 (confidence interval 87.9-98.2% -  $p = 1.0157 e-20$ ), with a 90% sensitivity and 80% specificity for cotinine measurements; of note, the threshold for smokers was here calculated to be 1.53 ng/ml, while 7 subjects who self-reported as non-smokers had cotinine levels >25 ng/ml at storage day 10 (arrows).
